# Supplementary material for: A bimetallic synergistic effect on the atomic scale of defect-enriched NiV-layered double hydroxide nanosheets for electrochemical phenol hydroxylation
Source: Royal Society of Chemistry journal article supplement (doi:10.1039/d1ta09412b), 2022-01-01
Supplement: d1ta09412b1.pdf [file d1ta09412b1.pdf]

## Supporting Information

### **Bimetallic Synergistic Effect on the Atomic-scale of the Defect-enriched NiV-Layered Double Hydroxide Nanosheets for Electrochemical Phenol Hydroxylation**

Guangyao Li,<sup>‡a</sup> Yanqi Xu,<sup>‡\*acd</sup> Hong Pan,<sup>b</sup> Xiangli Xie,<sup>b</sup> Rongrong Chen,<sup>a</sup> Di Wu,<sup>a</sup> and Linjiang Wang<sup>\*acd</sup>

<sup>a</sup> College of Materials Science and Engineering, Guilin University of Technology, Guilin 541004, China;

<sup>b</sup> College of Chemistry and Bioengineering, Guilin University of Technology, Guilin, 541004, China;

<sup>c</sup> Key Laboratory of New Technology for Processing Nonferrous Metals and Materials, Ministry of Education, Guilin University of Technology, Guilin 541004, China;

<sup>d</sup> Collaborative Innovation Center for Exploration of Hidden Nonferrous Metal Deposits and Development of New Materials in Guangxi, Guilin University of Technology, Guilin 541004, China;

<sup>‡</sup> These authors contributed equally to this work.

\* Corresponding author, E-mail: xuyanqi@glut.edu.cn; wlinjiang@163.com

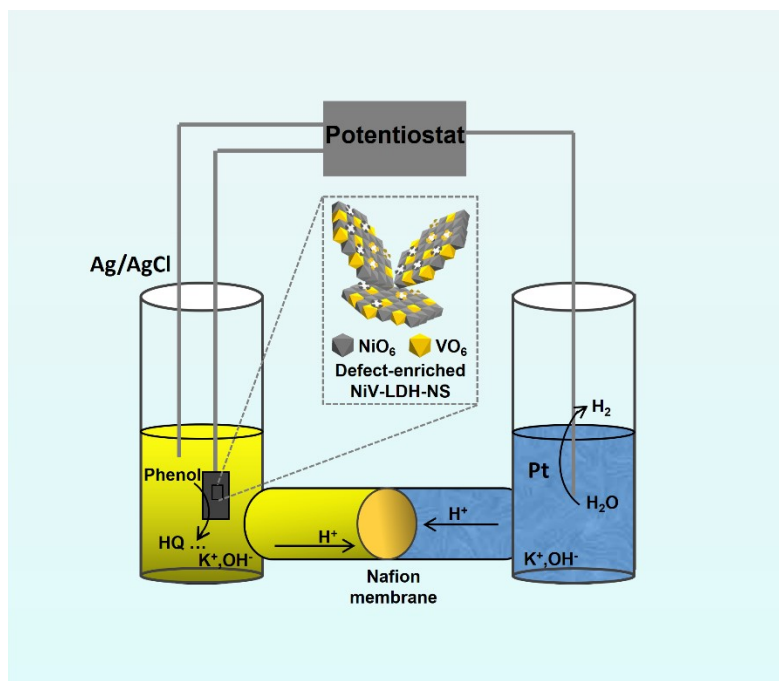

**Scheme S1** The chemicals-energy co-generation system.

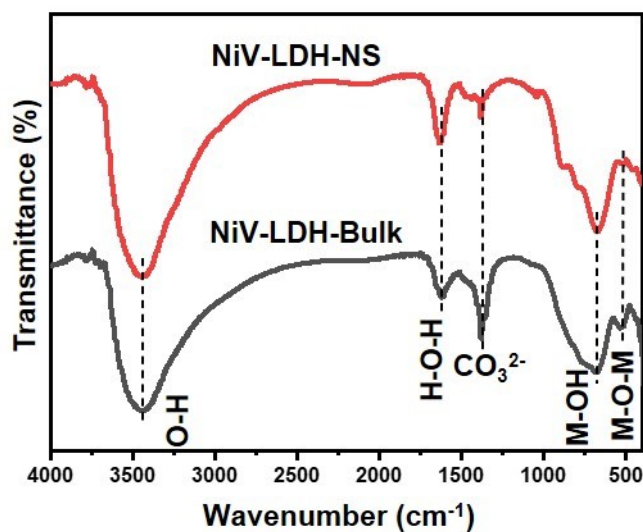

**Fig. S1** FTIR spectra of NiV-LDH-NS and NiV-LDH-Bulk.

The spectra of NiV-LDH showed a sharp absorption band with a center at  $\sim 1350$   $\text{cm}^{-1}$  assigned to the interlayer  $\text{CO}_3^{2-}$  anions. Broad absorptions located at  $\sim 3500$   $\text{cm}^{-1}$  and  $\sim 1650$   $\text{cm}^{-1}$  were assigned to the O-H stretching and bending vibration of interlayer water molecules, respectively. The absorption peaks at  $\sim 680$   $\text{cm}^{-1}$  and  $\sim 510$   $\text{cm}^{-1}$  were attributed to the vibrations of metal-O and metal-O-metal bonds, respectively.

**Table S1** Unit cell parameters of NiV-LDH-NS and NiV-LDH-Bulk.

| Entry | Sample       | $2\theta_{(110)}$ | $d_{(110)}$ [Å] | $a$ [Å] | Strain degree around (110) direction |
|-------|--------------|-------------------|-----------------|---------|--------------------------------------|
| 1     | NiV-LDH-NS   | 61.36             | 1.51            | 3.02    | -3.87%                               |
| 2     | NiV-LDH-Bulk | 60.03             | 1.54            | 3.08    | 0%                                   |

**Table S2** Comparison of physicochemical properties of NiV-LDH-NS and NiV-LDH-Bulk.

| Entry | Sample       | Surface area ( $\text{m}^2\text{g}^{-1}$ ) | Pore size (nm) | Pore volume ( $\text{cm}^3\text{g}^{-1}$ ) |
|-------|--------------|--------------------------------------------|----------------|--------------------------------------------|
| 1     | NiV-LDH-NS   | 239.97                                     | 3.68           | 0.22                                       |
| 2     | NiV-LDH-Bulk | 22.10                                      | 5.22           | 0.03                                       |

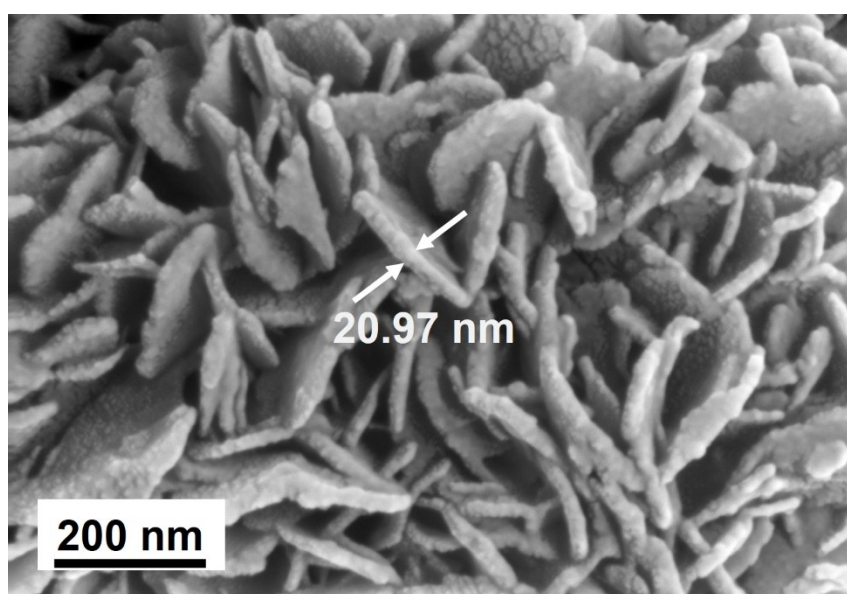

**Fig. S2** SEM image of NiV-LDH-Bulk.

**Table S3** Summary of elemental analysis data for NiV-LDH-NS and NiV-LDH-Bulk from ICP-AES results.

| Entry | Sample       | Ni (mM) | V (mM) | $\text{Ni}_x\text{V}_y(\text{OH})_2(\text{CO}_3)_z \cdot n\text{H}_2\text{O}$                       |
|-------|--------------|---------|--------|-----------------------------------------------------------------------------------------------------|
| 1     | NiV-LDH-NS   | 15.59   | 3.62   | $\text{Ni}_{0.802}\text{V}_{0.198}(\text{OH})_2(\text{CO}_3)_{0.084} \cdot 0.828\text{H}_2\text{O}$ |
| 2     | NiV-LDH-Bulk | 15.38   | 3.69   | $\text{Ni}_{0.807}\text{V}_{0.193}(\text{OH})_2(\text{CO}_3)_{0.096} \cdot 0.835\text{H}_2\text{O}$ |

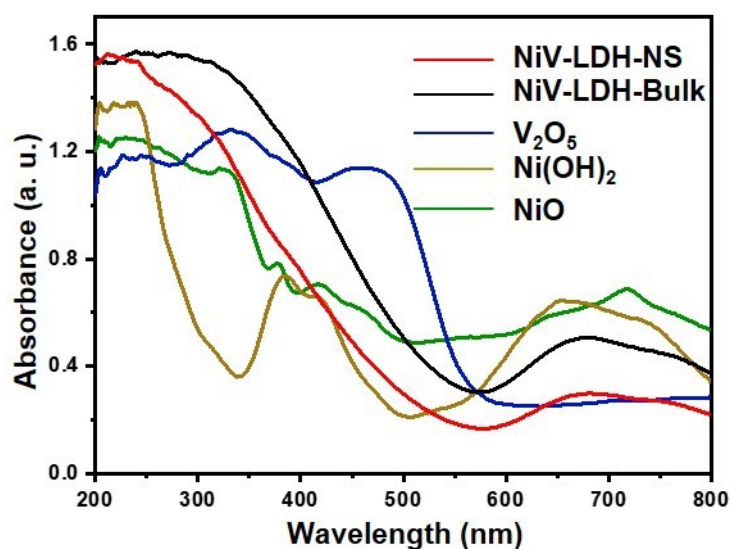

**Fig. S3** UV-vis diffuse reflectance spectroscopy of NiO, Ni(OH)<sub>2</sub>, V<sub>2</sub>O<sub>5</sub>, NiV-LDH-Bulk and NiV-LDH-NS, respectively.

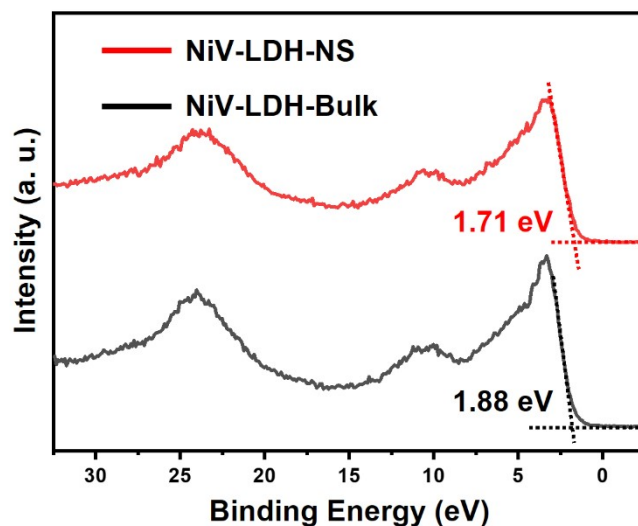

**Fig. S4** Valence band XPS spectra of NiV-LDH-NS and NiV-LDH-Bulk.

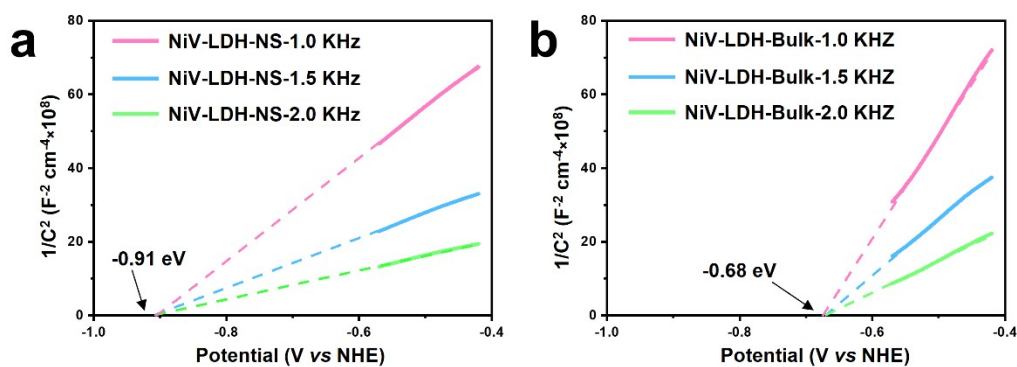

**Fig. S5** Mott-Schottky plots of (a) NiV-LDH-NS and (b) NiV-LDH-Bulk.

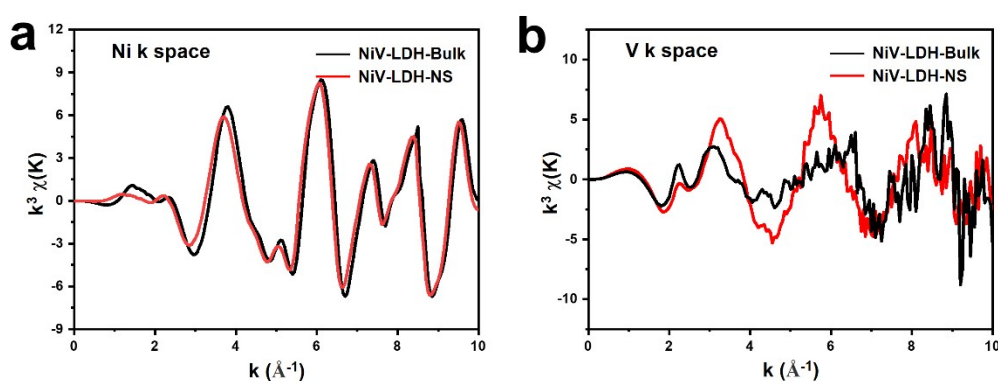

**Fig. S6** (a) Ni and (b) V K-edge EXAFS oscillation functions  $k^3 \chi(k)$  of NiV-LDH-NS and NiV-LDH-Bulk.

**Table S4** Local structure parameters around Ni estimated by EXAFS analysis.

| Sample       | Shell   | $N^{[a]}$ | $R$ [Å] <sup>[b]</sup> | $\sigma^2$ [Å <sup>2</sup> ] <sup>[c]</sup> |
|--------------|---------|-----------|------------------------|---------------------------------------------|
| NiV-LDH-Bulk | Ni-O    | 6.0       | 2.06                   | 0.0065                                      |
|              | Ni-Ni/V | 6.0       | 3.10                   | 0.0073                                      |
| NiV-LDH-NS   | Ni-O    | 5.4       | 2.06                   | 0.0066                                      |
|              | Ni-Ni/V | 5.6       | 3.10                   | 0.0076                                      |

[a]  $N$  = coordination number; [b]  $R$  = distance between absorber and backscatter atoms; [c]  $\sigma^2$  = Debye-Waller factor.

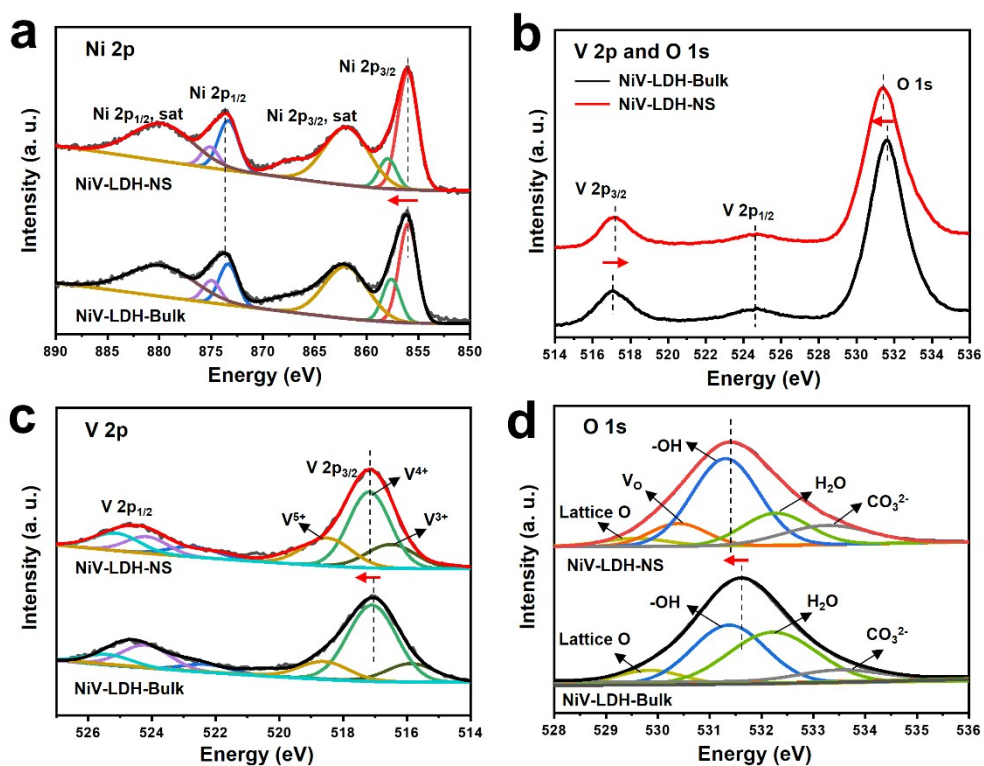

**Fig. S7** XPS spectra of NiV-LDH-Bulk and NiV-LDH-NS.

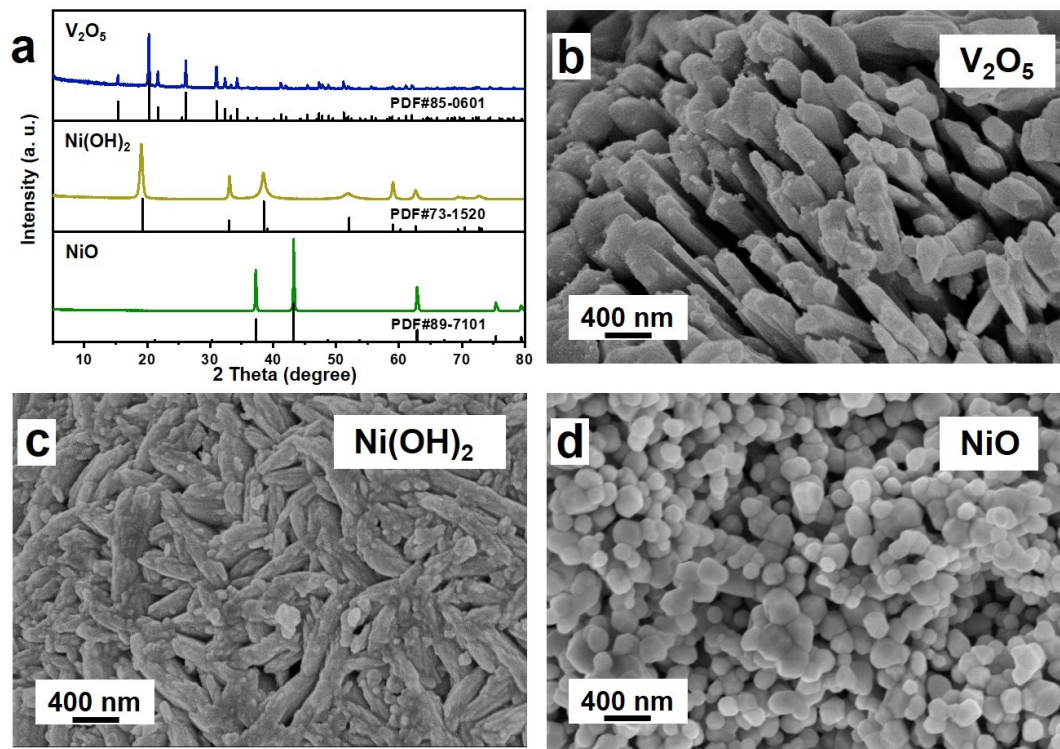

**Fig. S8** XRD patterns and SEM images of  $V_2O_5$ ,  $Ni(OH)_2$  and  $NiO$ , respectively.

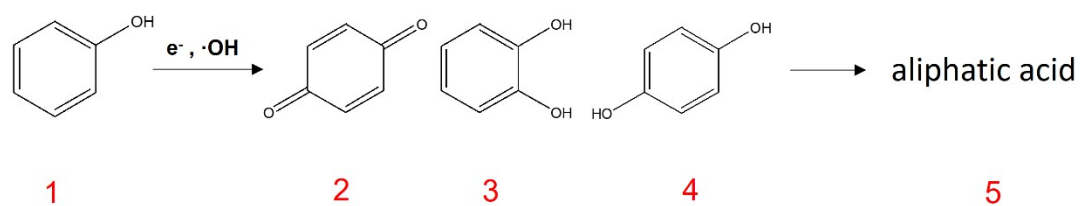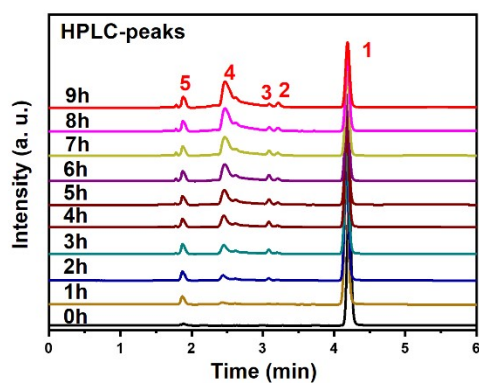

**Fig. S9** The procedure of electrochemical phenol hydroxylation over NiV-LDH-NS.

The main peaks seen in the Fig. S9 were marked for the electrocatalytic products, which corresponding to phenol (peak 1), benzoquinone (peak 2), catechol (peak 3), hydroquinone (peak 4), and aliphatic acid (peak 5).



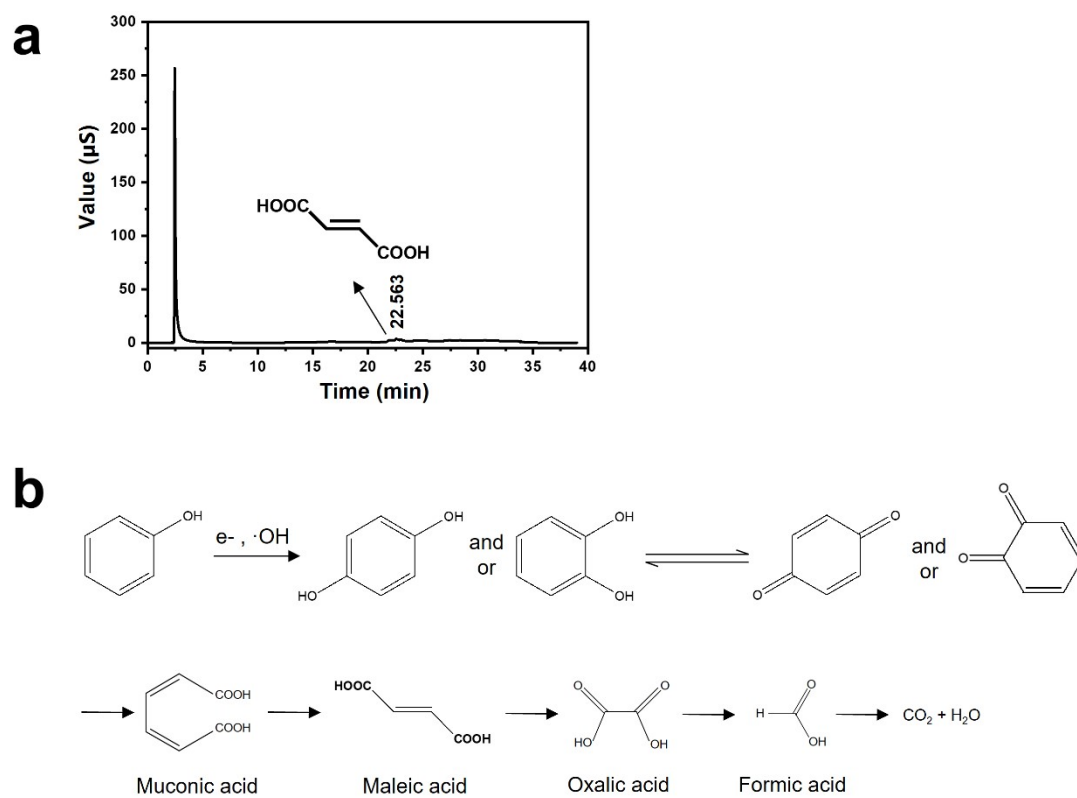

**Fig. S10** (a) The ion chromatography of the electrocatalytic products of phenol for NiV-LDH-NS electrocatalyst in 9 h. (b) The degradation process of phenol.

**Table S5.** Comparison of phenol hydroxylation activity with different chemical methods.

| Catalyst                                  | Reaction Condition | Oxidation Agent               | Solvent          | Phenol Conversion | Product Selectivity          | Ref.         |
|-------------------------------------------|--------------------|-------------------------------|------------------|-------------------|------------------------------|--------------|
| Fe-ESP                                    | 37 °C              | H <sub>2</sub> O <sub>2</sub> | acetonitrile     | 25%               | 17% (CAT)<br>8% (HQ)         | 39           |
| Fe <sub>3</sub> O <sub>4</sub><br>@CuMgAl | 65 °C              | H <sub>2</sub> O <sub>2</sub> | H <sub>2</sub> O | 29.8%             | 64.4%<br>(CAT)<br>34.5% (HQ) | 40           |
| Cr-MOF-199                                | 70 °C              | H <sub>2</sub> O <sub>2</sub> | acetonitrile     | 71%               | 35% (CAT)<br>20% (HQ)        | 2            |
| GO-Cu-SiO <sub>2</sub> -<br>SA            | 70 °C              | H <sub>2</sub> O <sub>2</sub> | H <sub>2</sub> O | 90%               | 60% (CAT)<br>40% (HQ)        | 41           |
| NiFe-LDH                                  | Xe lamp<br>550 nm  | H <sub>2</sub> O <sub>2</sub> | H <sub>2</sub> O | 40%               | 69% (CAT)<br>30% (HQ)        | 23           |
| NiV-LDH-<br>NS                            | 0.5V vs<br>Ag/AgCl | H <sub>2</sub> O              | H <sub>2</sub> O | 72%               | HQ<br>(71%)                  | This<br>work |

CAT: catechol, HQ: hydroquinone.

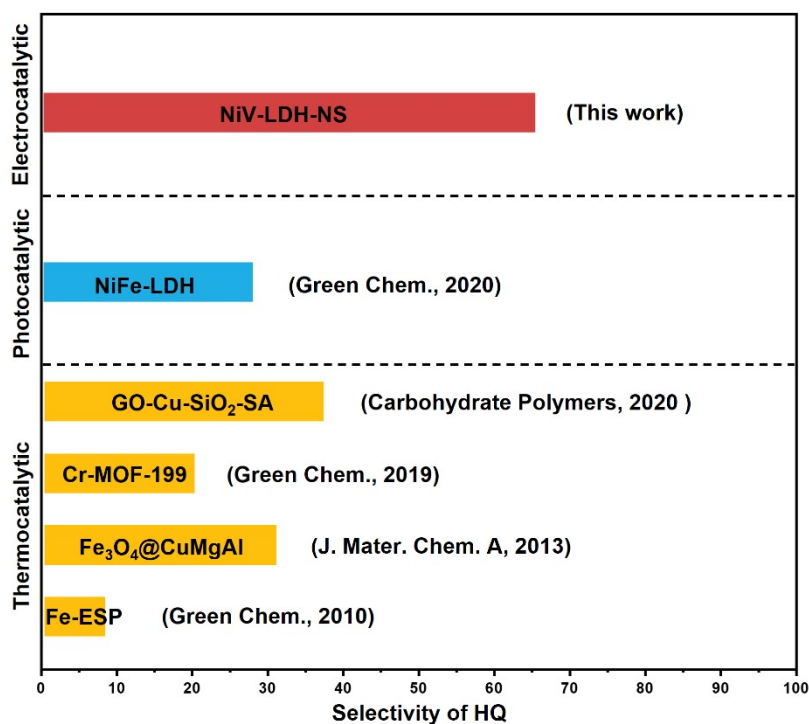

**Fig. S11.** Selectivity of HQ compared to different reported catalyst.

**Table S6.** Comparison of phenol hydroxylation activity with the industrial process.

| Catalyst   | Reaction Condition | Oxidation Agent                              | Solvent                | Phenol Conversion | Product Selectivity | Recycle | Ref.      |
|------------|--------------------|----------------------------------------------|------------------------|-------------------|---------------------|---------|-----------|
| TS-1       | 70–100 °C          | H <sub>2</sub> O <sub>2</sub><br>(30–50 wt%) | acetone or<br>methanol | 20–25%            | DHB<br>(90–95%)     | —       | 42        |
| NiV-LDH-NS | 0.5V vs<br>Ag/AgCl | H <sub>2</sub> O                             | H <sub>2</sub> O       | 72%               | HQ<br>(71%)         | √       | This work |

DHB: dihydroxybenzenes (catechol and hydroquinone), HQ: hydroquinone.

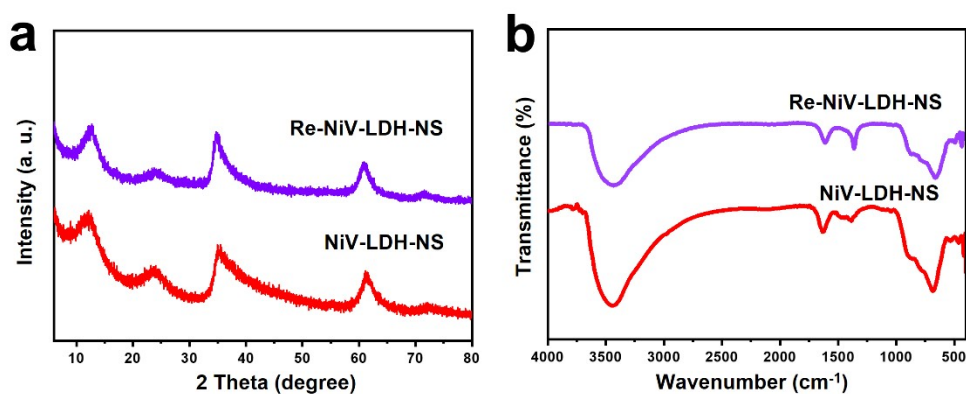

**Fig. S12** (a) XRD patterns and (b) FTIR spectra of NiV-LDH-NS and Re-NiV-LDH-NS.

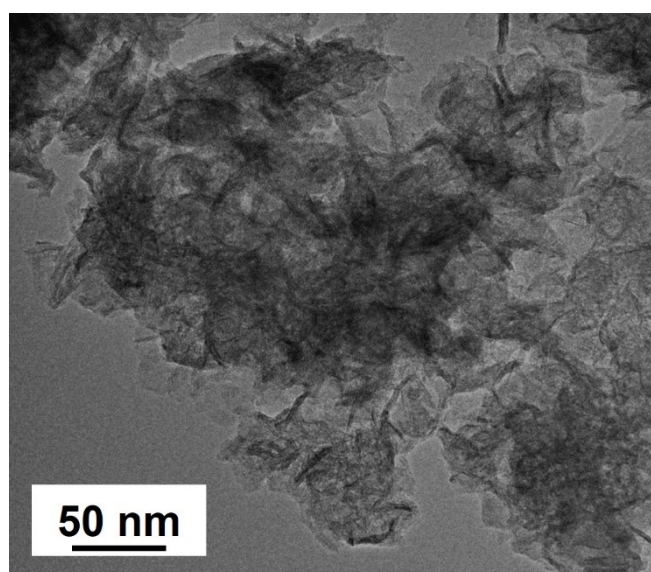

**Fig. S13** HRTEM image of Re-NiV-LDH-NS.

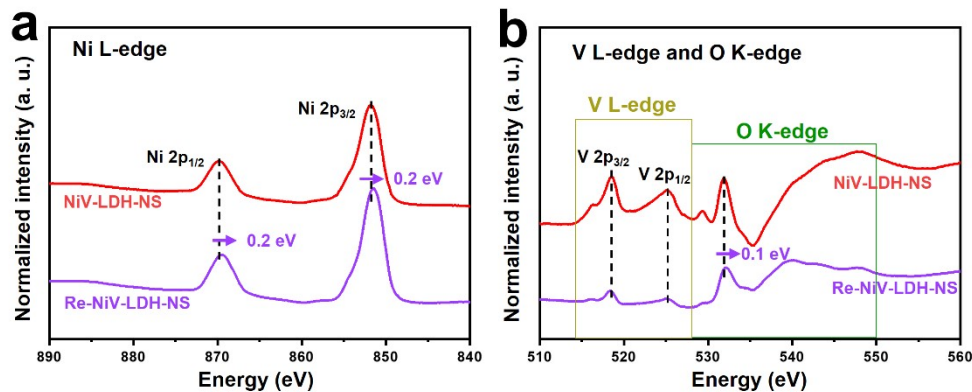

**Fig. S14** XAS spectra of Re-NiV-LDH-NS (purple) and NiV-LDH-NS (red), respectively.

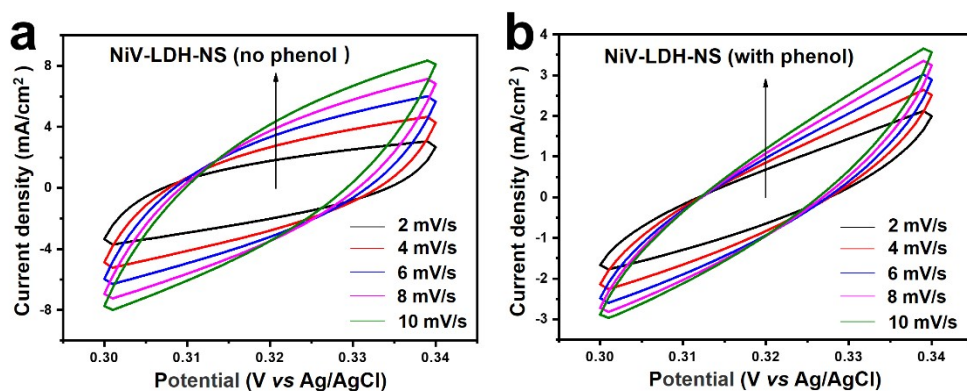

**Fig. S15** CV curves of NiV-LDH-NS for (a) water oxidation and (b) phenol hydroxylation.

To further understand the reason behind the high catalytic performance of NiV-LDH-NS with and without phenol, electrochemical active surface areas (ECSA) were obtained from cyclic voltammetry (CV) curves in 1 M KOH and compared. It was well known that the increase of ECSA often led to enhancement of the catalytic activity. Fig. S15 showed typical CV curves of 0.3 ~ 0.34 V vs Ag/AgCl with different scan rates. By plotting the  $\Delta J$  at 0.32 V vs Ag/AgCl against the scan rate, the linear slope that was twice the double layer capacitance ( $C_{dl}$ ) could be obtained and was normally used to represent the corresponding ECSA.

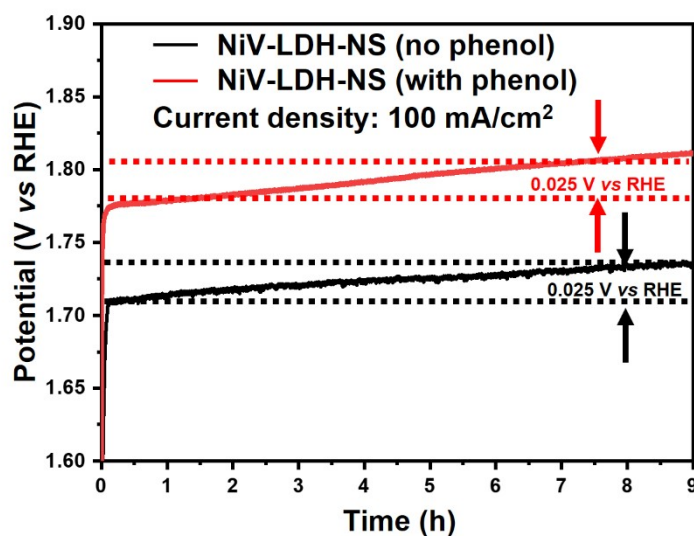

**Fig. S16** The chronoamperometry experiments of NiV-LDH-NS with and without 10 mM phenol at the current density of 100 mA cm<sup>-2</sup>.

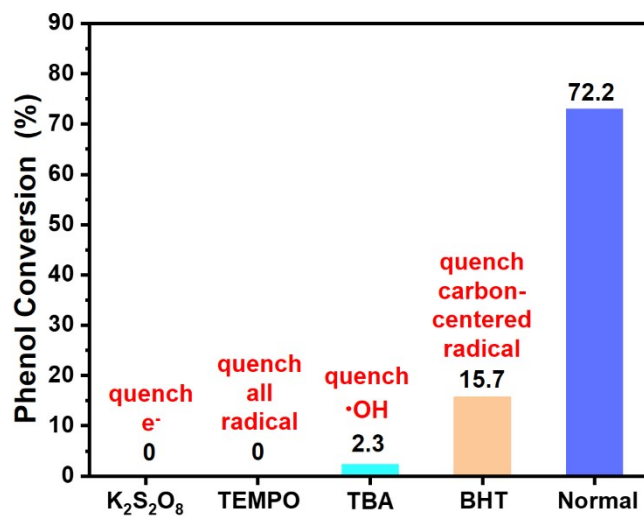

**Fig. S17** The conversion of phenol hydroxylation in the addition of various scavengers respectively. Reaction condition: NiV-LDH-NS 20 mg, 40 °C, onset potential 0.5 V vs Ag/AgCl, and reaction time 9 h.
